# Supplementary material for: Synthesis and characterization of lipophilic cationic Ga(iii) complexes based on the H2CHXdedpa and H2dedpa ligands and their 67/68Ga radiolabeling studies
Source: Royal Society of Chemistry journal article supplement (doi:10.1039/c6ra24070d), 2016-01-01
Supplement: c6ra24070d1.pdf [file c6ra24070d1.pdf]

**Supporting Information For:**

**Synthesis and characterization of lipophilic cationic Ga(III) complexes  
based on the H<sub>2</sub>CHXdedpa and H<sub>2</sub>dedpa ligands and their <sup>67/68</sup>Ga  
radiolabelling studies**

C. F. Ramogida<sup>1,2</sup>, D. Schindler<sup>1</sup>, C. Schneider<sup>1</sup>, Y. L. K. Tan<sup>1</sup>, S. Huh<sup>1</sup>, C. L. Ferreira<sup>3</sup>, M. J. Adam<sup>2</sup>, and C. Orvig<sup>\*,1</sup>

<sup>1</sup>Medicinal Inorganic Chemistry Group, Department of Chemistry, University of British Columbia, 2036 Main Mall, Vancouver, British Columbia, Canada, V6T 1Z1. <sup>2</sup>TRIUMF, 4004 Wesbrook Mall, Vancouver, British Columbia, Canada, V6T 2A3. <sup>3</sup>Nordion, 4004 Wesbrook Mall, Vancouver, British Columbia, Canada, V6T 2A3.

\*Corresponding author: orvig@chem.ubc.ca

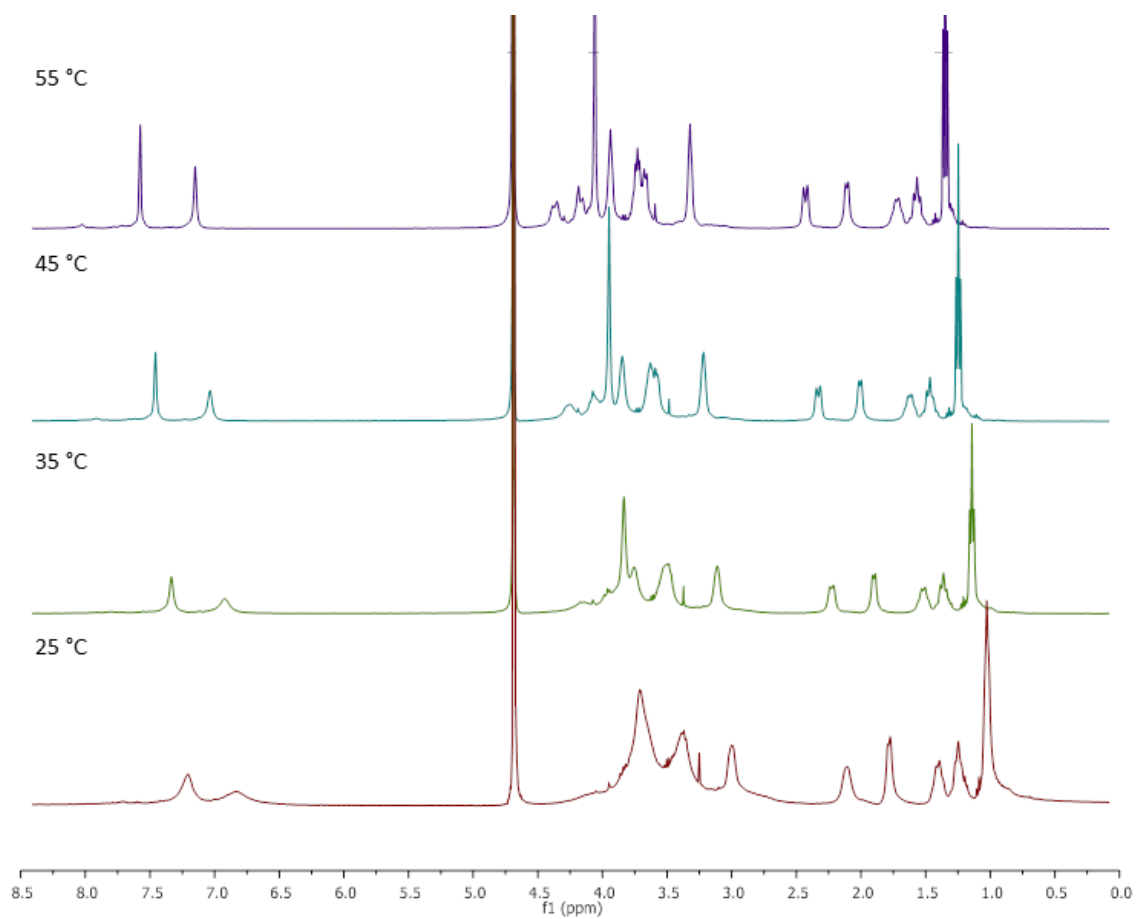

**Figure S1.** Variable temperature (VT) <sup>1</sup>H NMR spectra of H<sub>2</sub>CHXdedpa<sub>OMe</sub>-*N,N'*-ee (**12**) (400 MHz, D<sub>2</sub>O, 25 – 55°C).

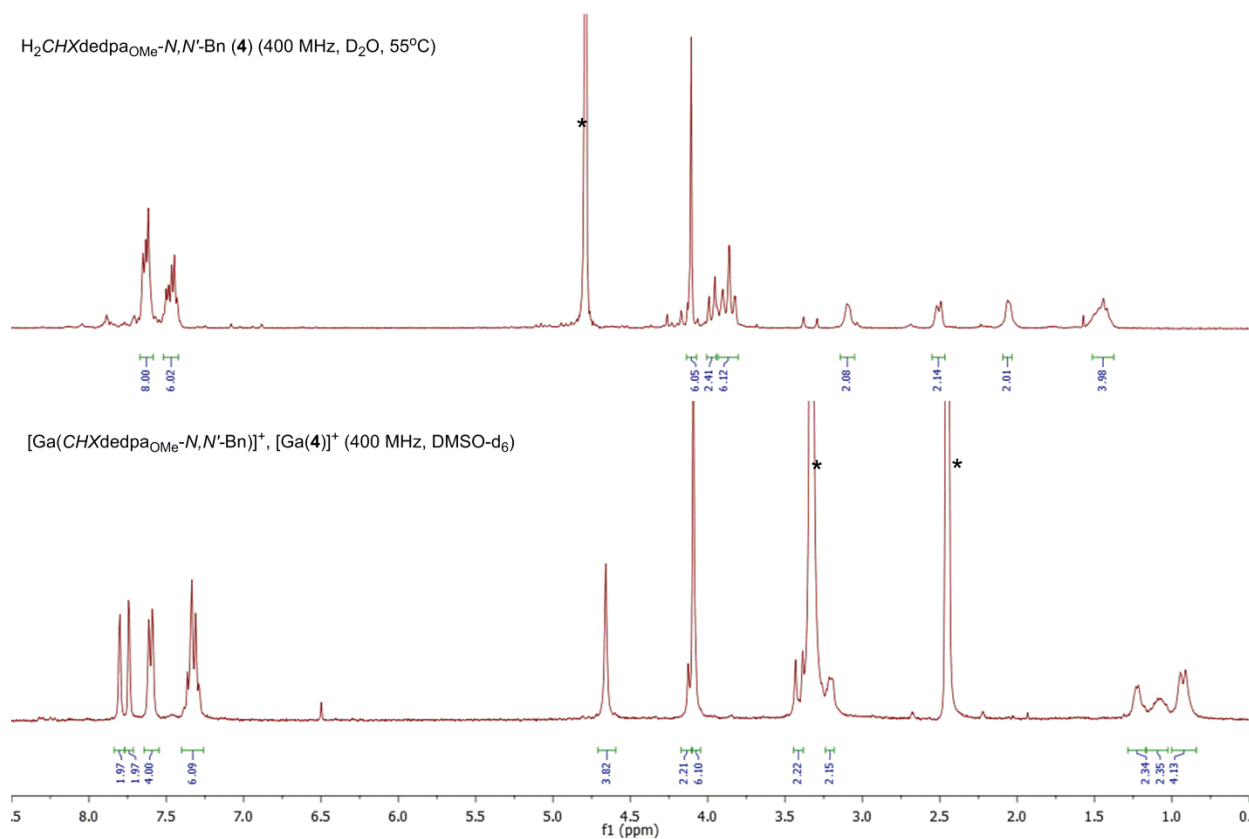

**Figure S2.**  $^1\text{H}$  NMR spectra of (top)  $\text{H}_2\text{dedpa}_{\text{OMe}}\text{-N,N'-Bn}$  (**4**), 400 MHz,  $\text{D}_2\text{O}$ , 25°C and (bottom)  $[\text{Ga}(\mathbf{4})]^+$  (400 MHz,  $\text{DMSO-d}_6$ , 25°C), highlighting shifts in hydrogen resonances upon metal-complexation.

\*Residual solvent peak.

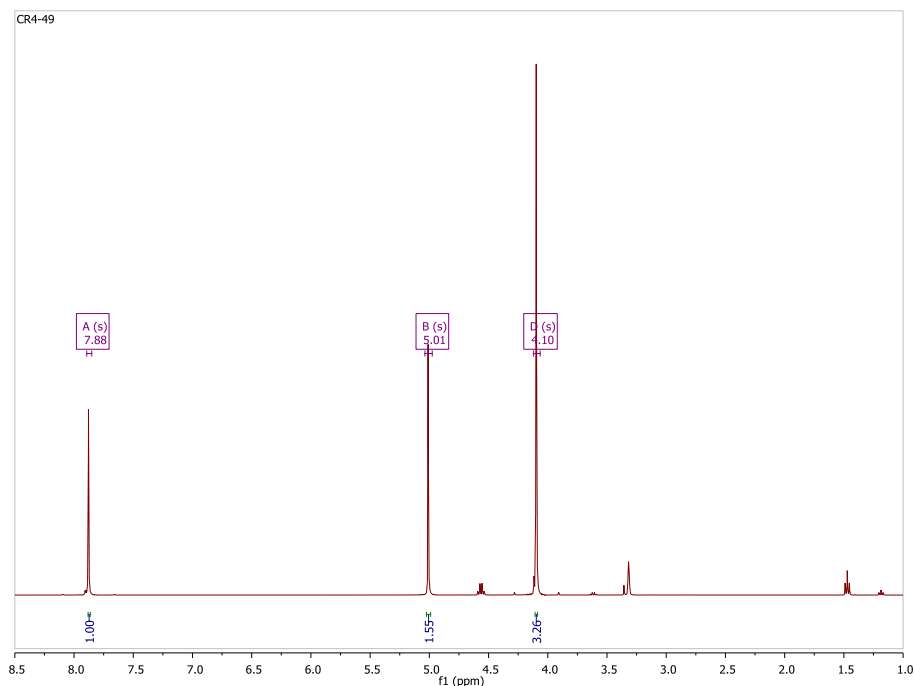

**Figure S3.**  $^1\text{H}$  NMR of spectrum of dimethyl 4-hydroxypyridine-2,6-dicarboxylate (**7**) in  $\text{MeOD-d}_4$  (400 MHz).

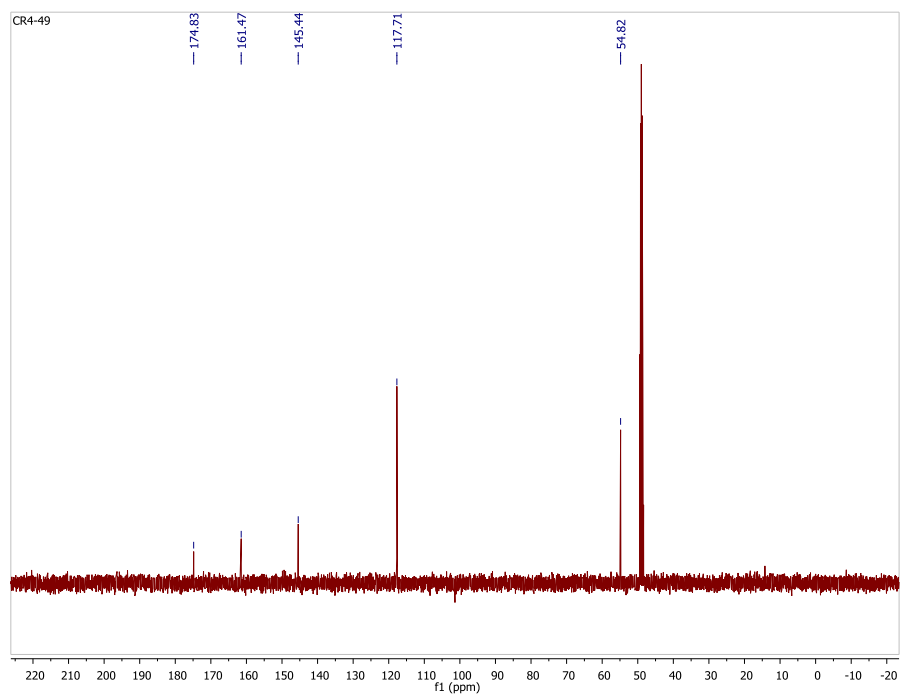

**Figure S4.**  $^{13}\text{C}$  NMR of spectrum of dimethyl 4-hydroxypyridine-2,6-dicarboxylate (**7**) in  $\text{MeOD-d}_4$  (101 MHz).

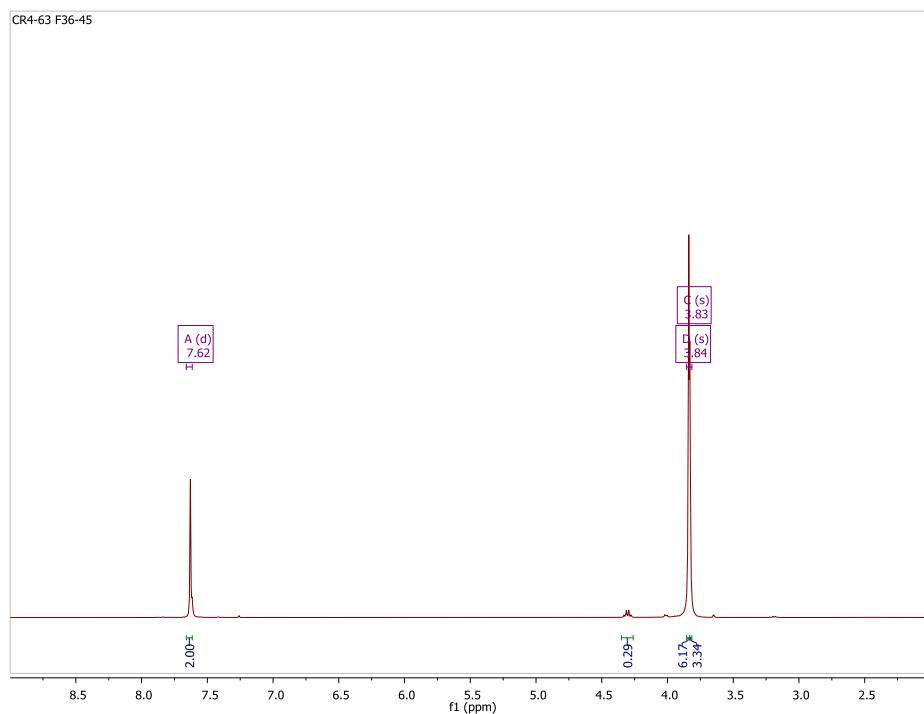

**Figure S5.**  $^1\text{H}$  NMR of spectrum of dimethyl 4-methoxypyridine-2,6-dicarboxylate (**8**) in  $\text{CDCl}_3$  (400 MHz).

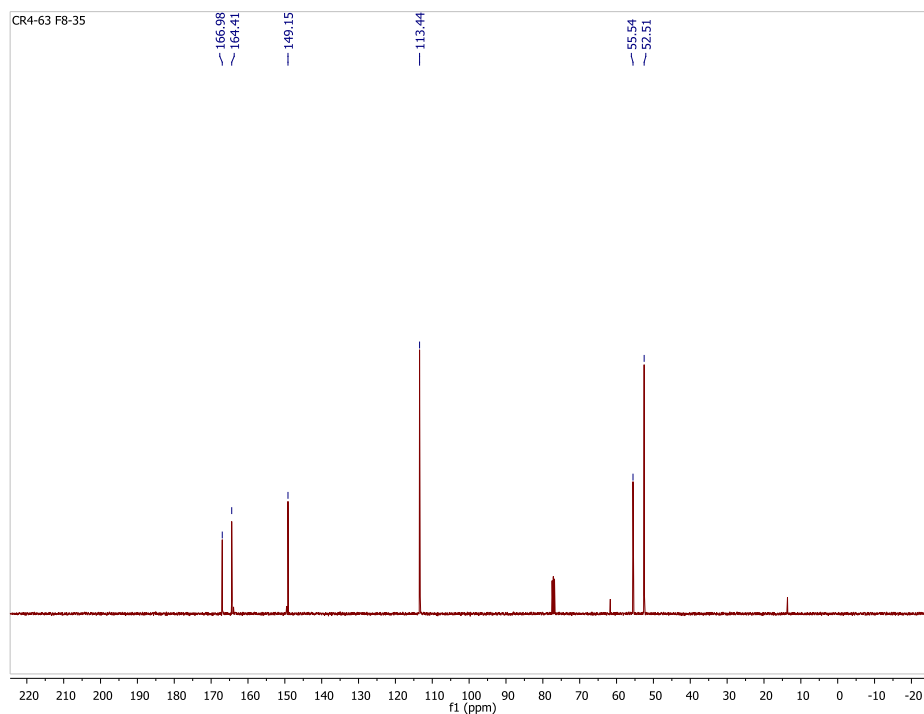

**Figure S6.**  $^{13}\text{C}$  NMR of spectrum of dimethyl 4-methoxypyridine-2,6-dicarboxylate (**8**) in  $\text{CDCl}_3$  (101 MHz).

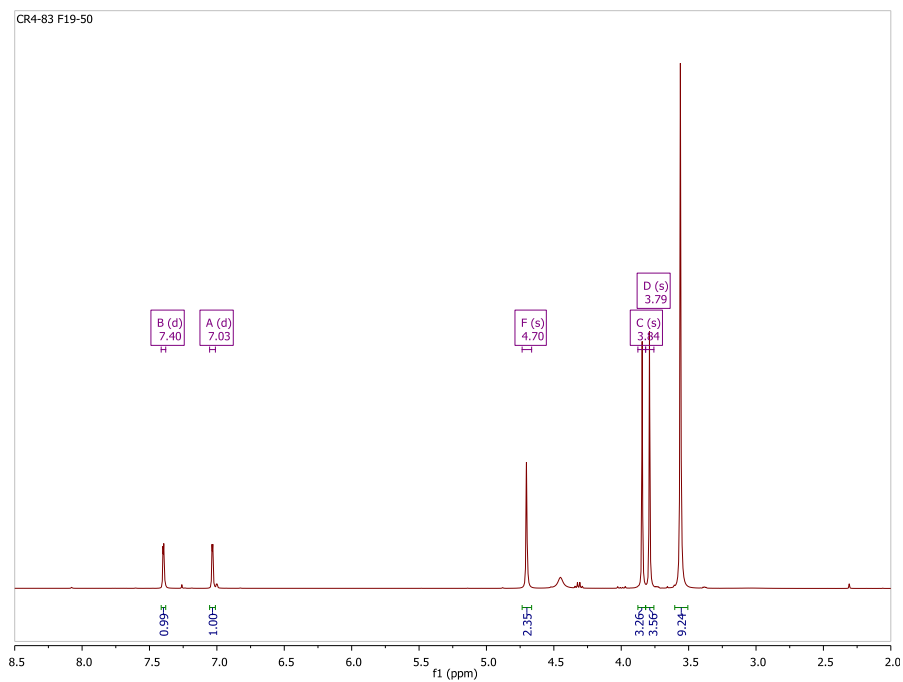

**Figure S7.**  $^1\text{H}$  NMR of spectrum of methyl 6-(hydroxymethyl)-4-methoxypicolinate (**9**) in  $\text{CDCl}_3$  (400 MHz).

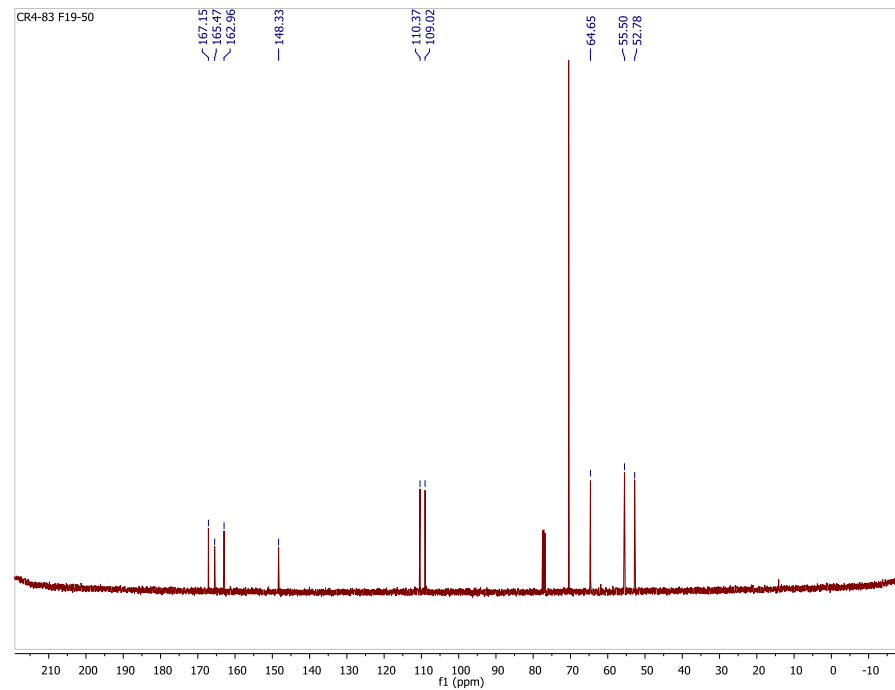

**Figure S8.**  $^{13}\text{C}$  NMR of spectrum of methyl 6-(hydroxymethyl)-4-methoxypicolinate (**9**) in  $\text{CDCl}_3$  (101 MHz).

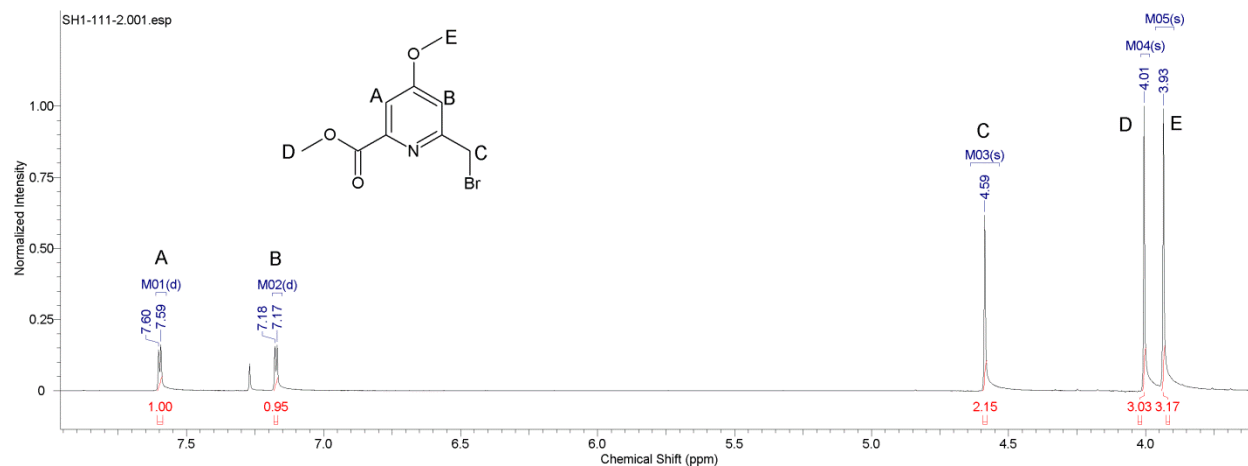

**Figure S9.**  $^1\text{H}$  NMR of spectrum of methyl 6-(bromomethyl)-4-methoxypicolinate (**10**) in  $\text{CDCl}_3$  (300 MHz).

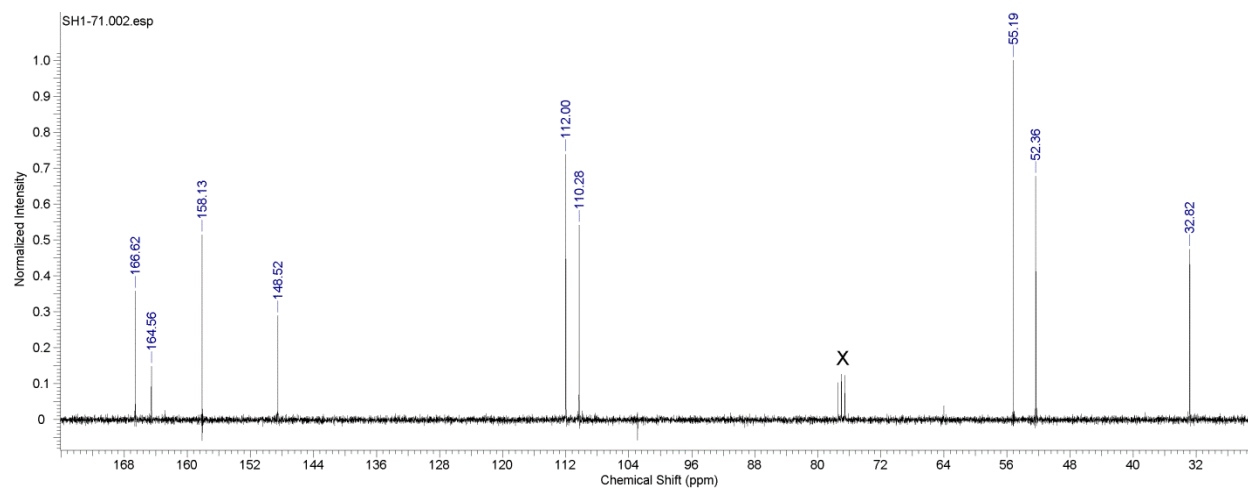

**Figure S10.**  $^{13}\text{C}$  NMR of spectrum of methyl 6-(bromomethyl)-4-methoxypicolinate (**10**) in  $\text{CDCl}_3$  (75 MHz).

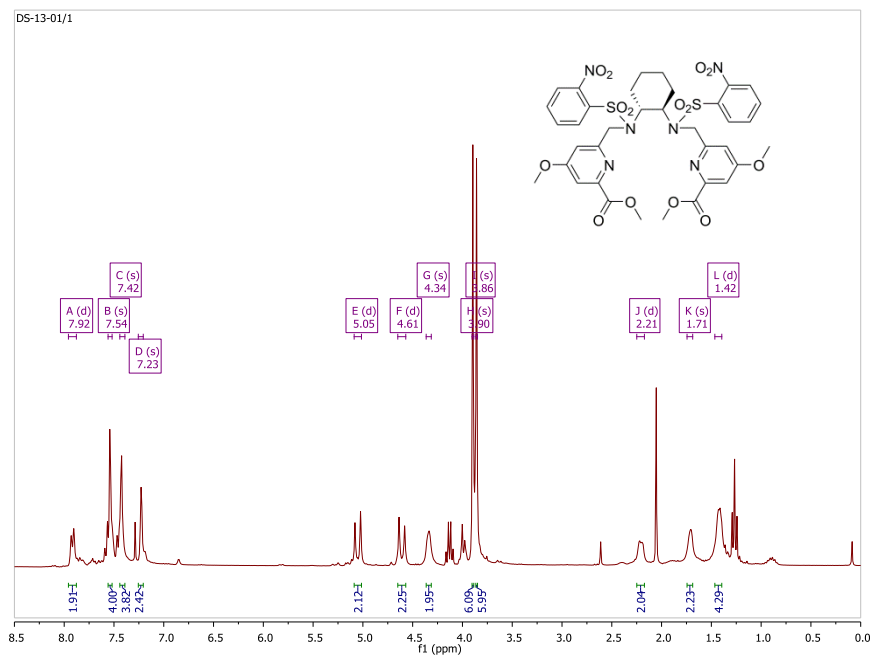

**Figure S11.**  $^1\text{H}$  NMR of spectrum of dimethyl 6,6'-((((1*R*,2*R*)-cyclohexane-1,2-diyl)bis(((2-nitrophenyl)sulfonyl) azanediy))bis(methylene))bis(4-methoxypicolinate) (**11**) in  $\text{CDCl}_3$  (300 MHz).

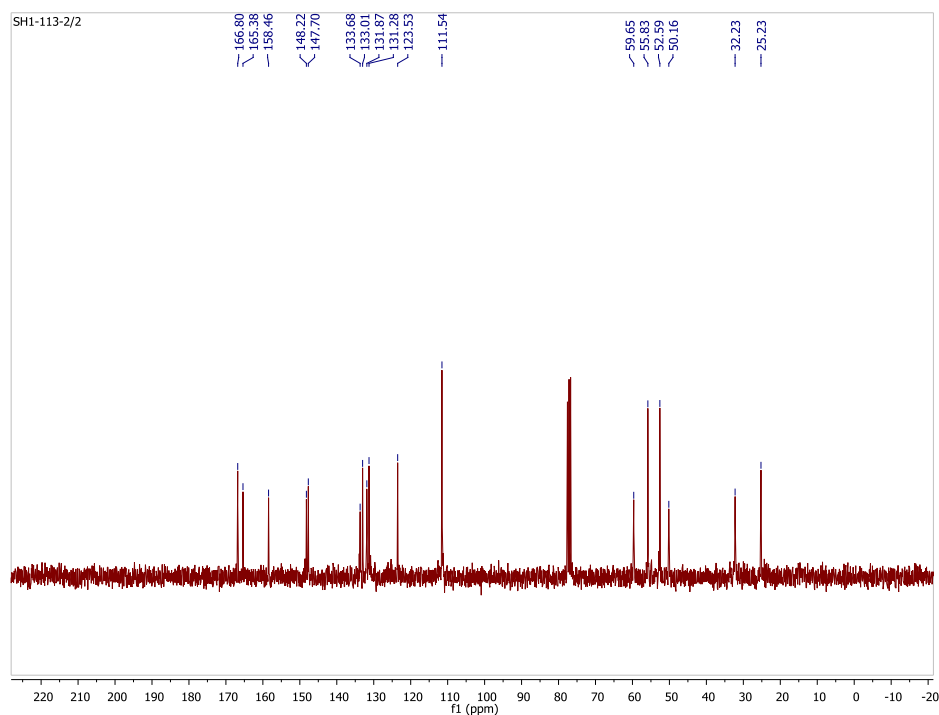

**Figure S12.**  $^{13}\text{C}$  NMR of spectrum of dimethyl 6,6'-((((1*R*,2*R*)-cyclohexane-1,2-diyl)bis(((2-nitrophenyl)sulfonyl) azanediy))bis(methylene))bis(4-methoxypicolinate) (**11**) in  $\text{CDCl}_3$  (75 MHz).



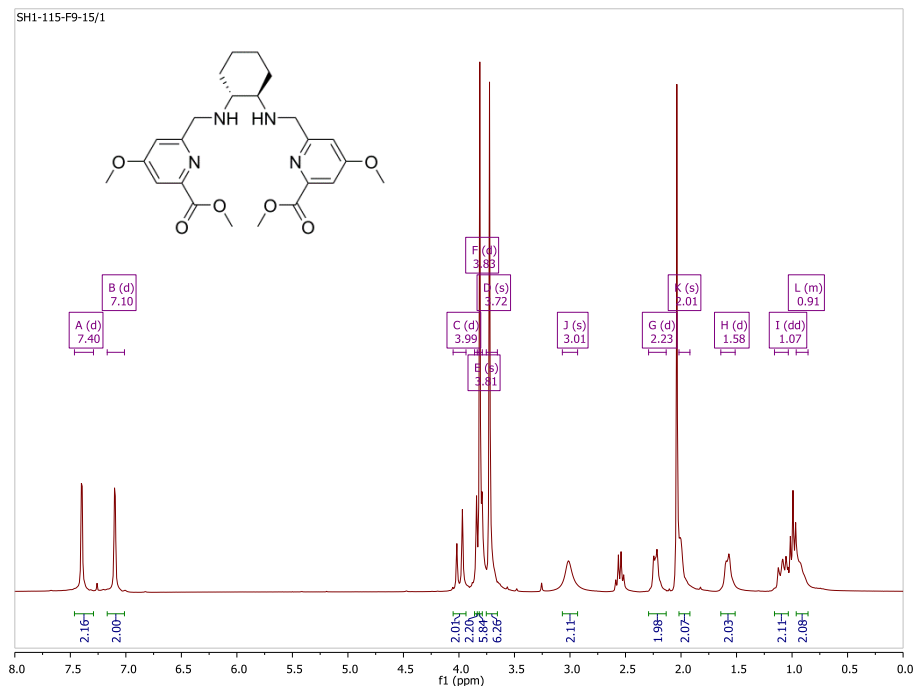

**Figure S13.** <sup>1</sup>H NMR of dimethyl 6,6'-((((1*R*,2*R*)-cyclohexane-1,2-diyl)bis(azanediyl))bis(methylene))bis(4-methoxycarbonylphenyl) (12) in CDCl<sub>3</sub> (300 MHz).

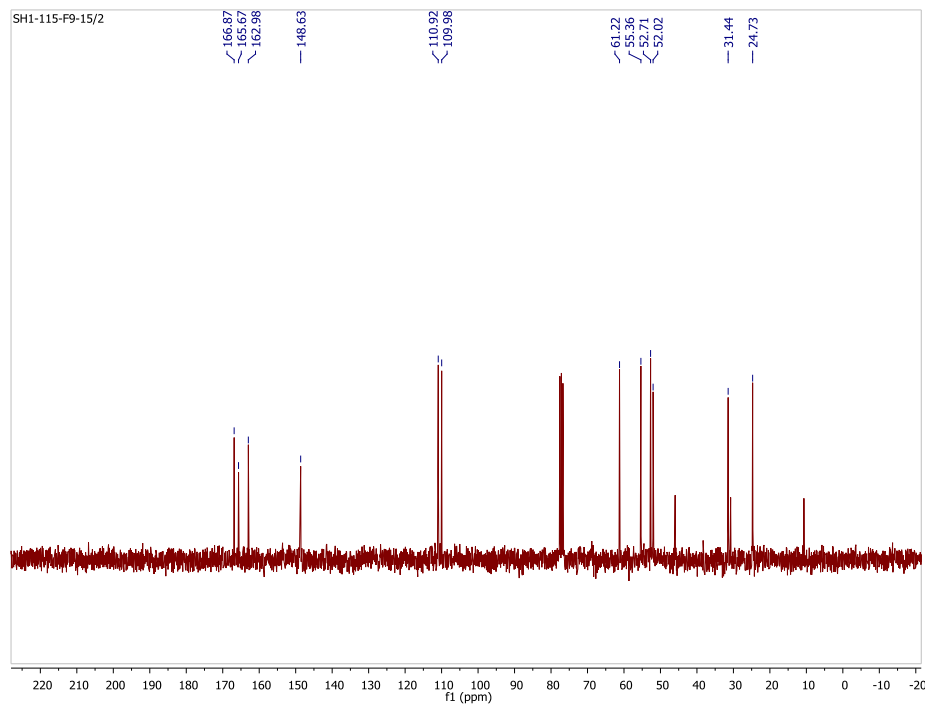

**Figure S14.** <sup>13</sup>C NMR of dimethyl 6,6'-((((1*R*,2*R*)-cyclohexane-1,2-diyl)bis(azanediyl))bis(methylene))bis(4-methoxycarbonylphenyl) (12) in CDCl<sub>3</sub> (75 MHz).

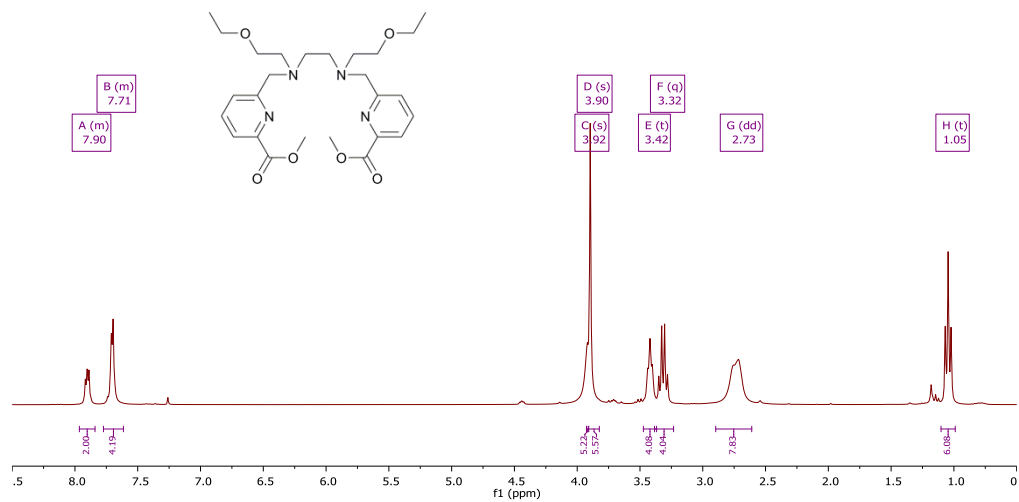

**Figure S15.** <sup>1</sup>H NMR of Me<sub>2</sub>dedpa-*N,N'*-ee (**13**) in CDCl<sub>3</sub> (300 MHz).

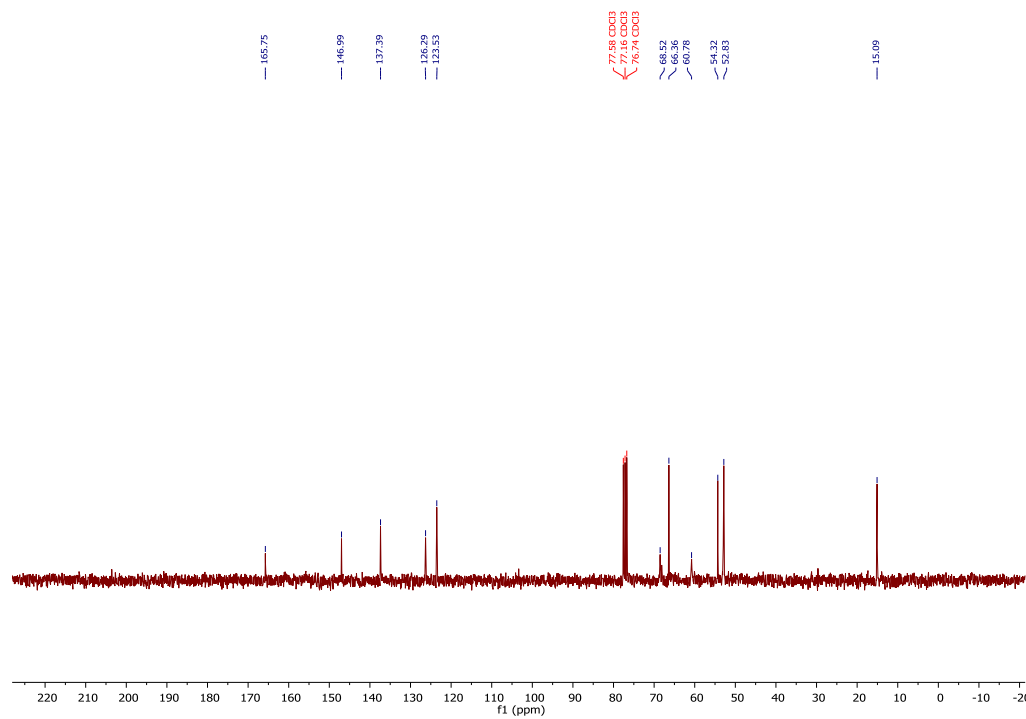

**Figure S16.** <sup>13</sup>C NMR of Me<sub>2</sub>dedpa-*N,N'*-ee (**13**) in CDCl<sub>3</sub> (75 MHz).

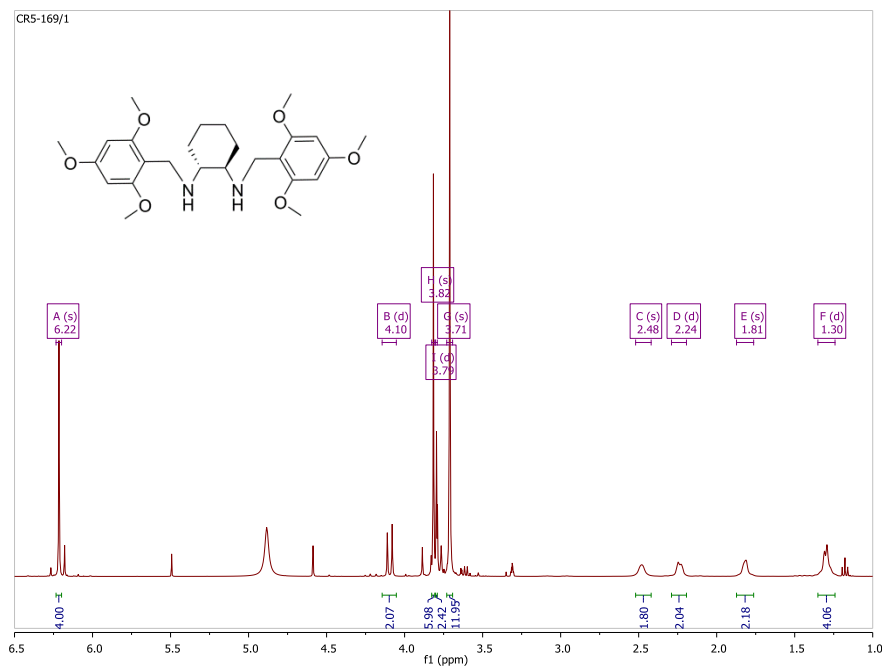

**Figure S17.** <sup>1</sup>H NMR of (1*R*,2*R*)-*N*<sup>1</sup>,*N*<sup>2</sup>-bis(2,4,6-trimethoxybenzyl)cyclohexane-1,2-diamine (**18**) in MeOD-*d*<sub>4</sub> (400 MHz).

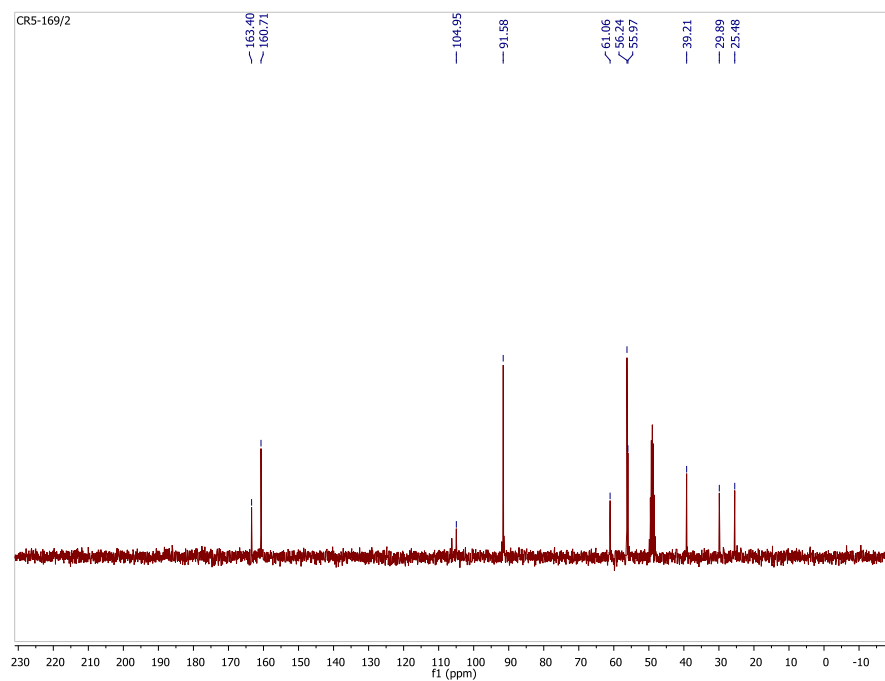

**Figure S18.** <sup>13</sup>C NMR of (1*R*,2*R*)-*N*<sup>1</sup>,*N*<sup>2</sup>-bis(2,4,6-trimethoxybenzyl)cyclohexane-1,2-diamine (**18**) in MeOD-*d*<sub>4</sub> (75 MHz).

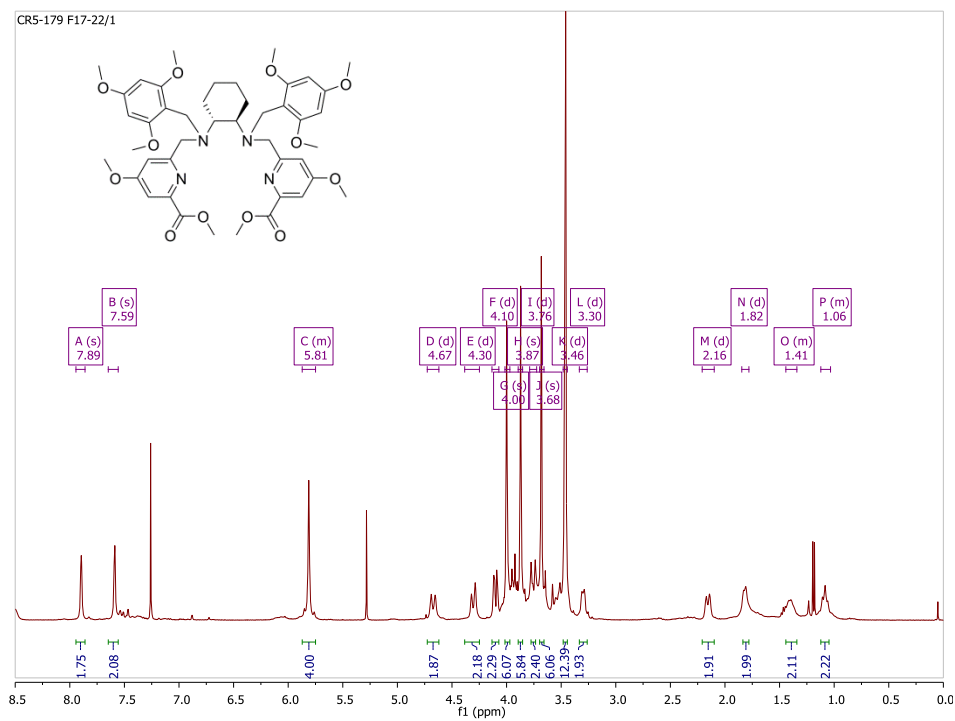

**Figure S19.**  $^1\text{H}$  NMR of  $\text{Me}_2\text{CHXdedpa}_{\text{OMe}}\text{-}N,N'\text{-Bn}_{3\text{OMe}}$  (**19**) in  $\text{CDCl}_3$  (400 MHz).

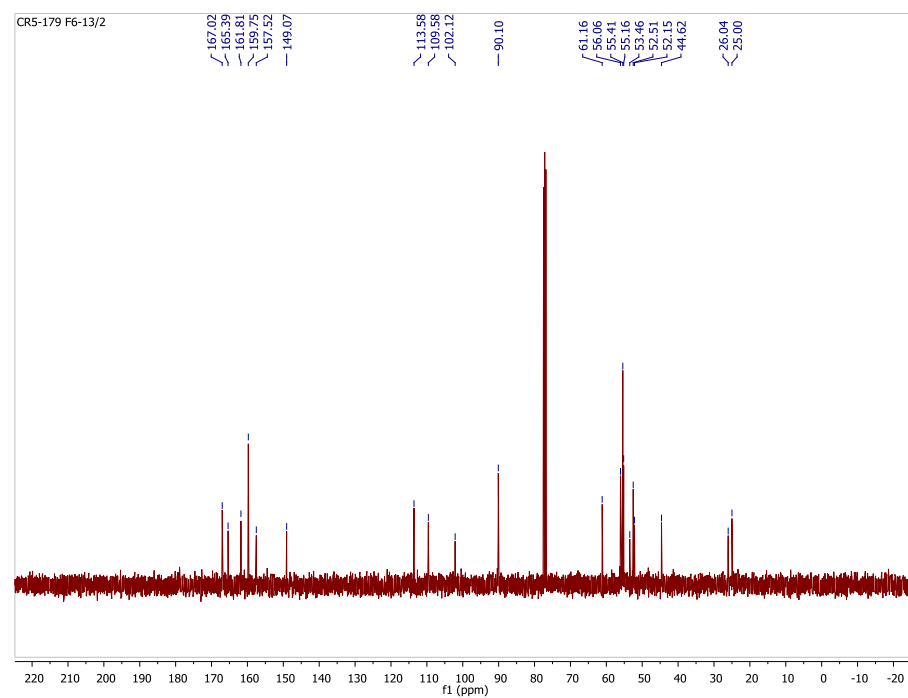

**Figure S20.**  $^{13}\text{C}$  NMR of  $\text{Me}_2\text{CHXdedpa}_{\text{OMe}}\text{-}N,N'\text{-Bn}_{3\text{OMe}}$  (**19**) in  $\text{CDCl}_3$  (101 MHz).

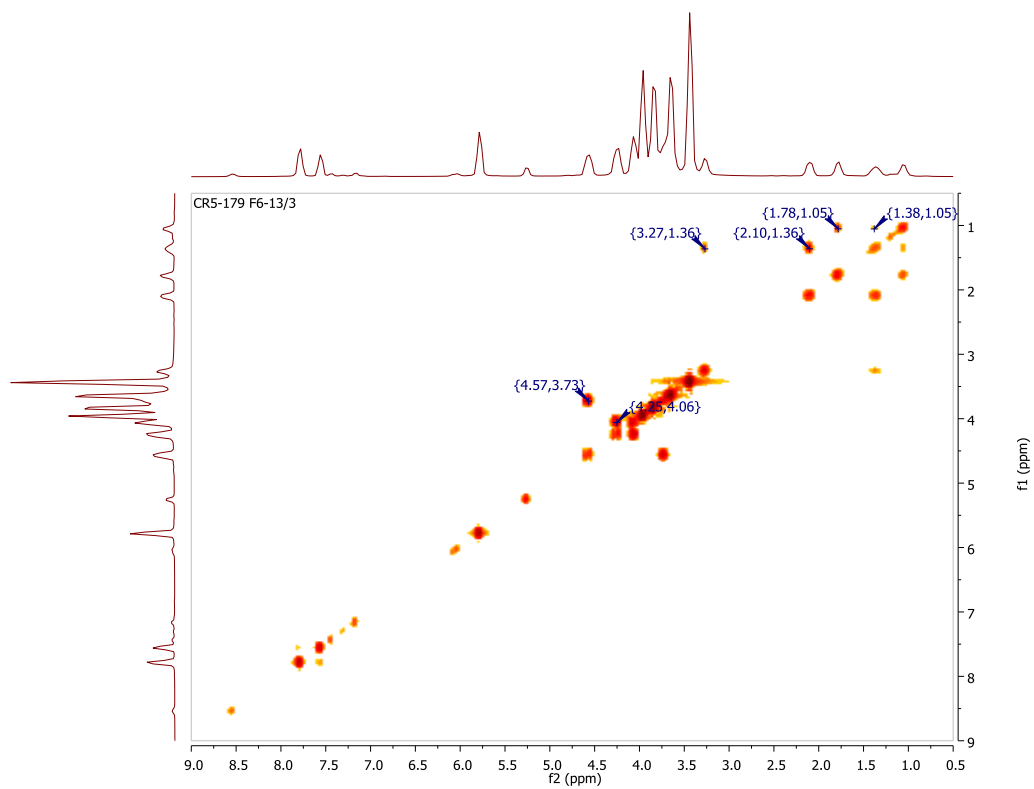

**Figure S21.**  $^1\text{H}$ - $^1\text{H}$  COSY NMR of  $\text{Me}_2\text{CHXdedpa}_{\text{OMe}}\text{-}N,N'\text{-Bn}_{3\text{OMe}}$  (**19**) in  $\text{CDCl}_3$  (400 MHz).

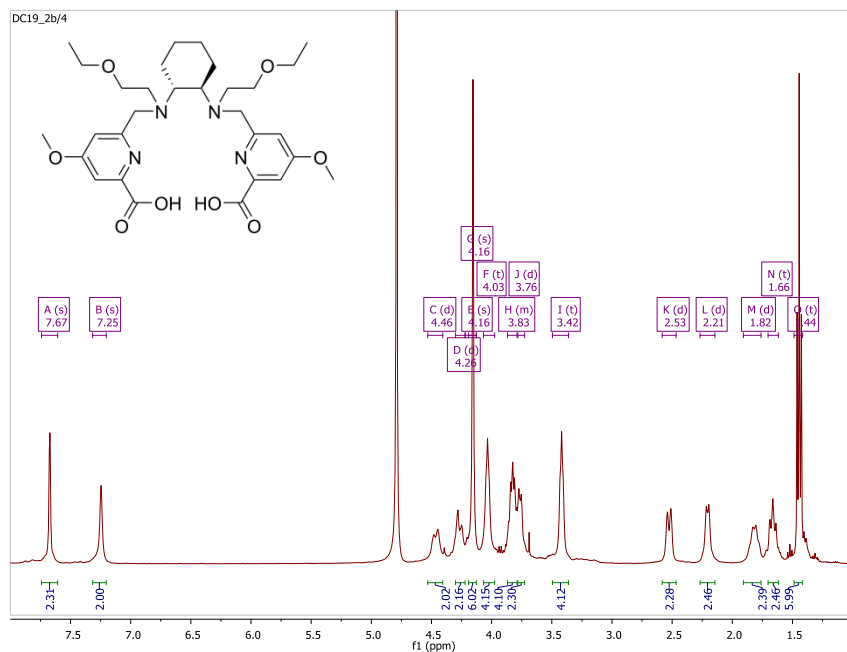

**Figure S22.**  $^1H$  NMR of  $H_2CHXdedpa_{OMe}-N,N'$ -ee (**3**) in  $D_2O$  (400 MHz,  $55^\circ C$ ).

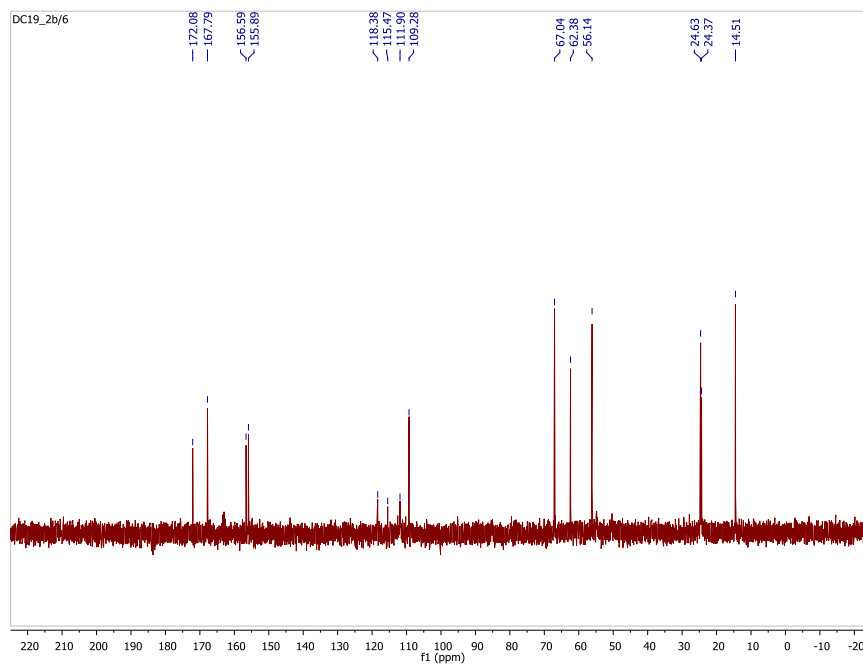

**Figure S23.**  $^{13}C$  NMR of  $H_2CHXdedpa_{OMe}-N,N'$ -ee (**3**) in  $D_2O$  (101 MHz,  $55^\circ C$ ).

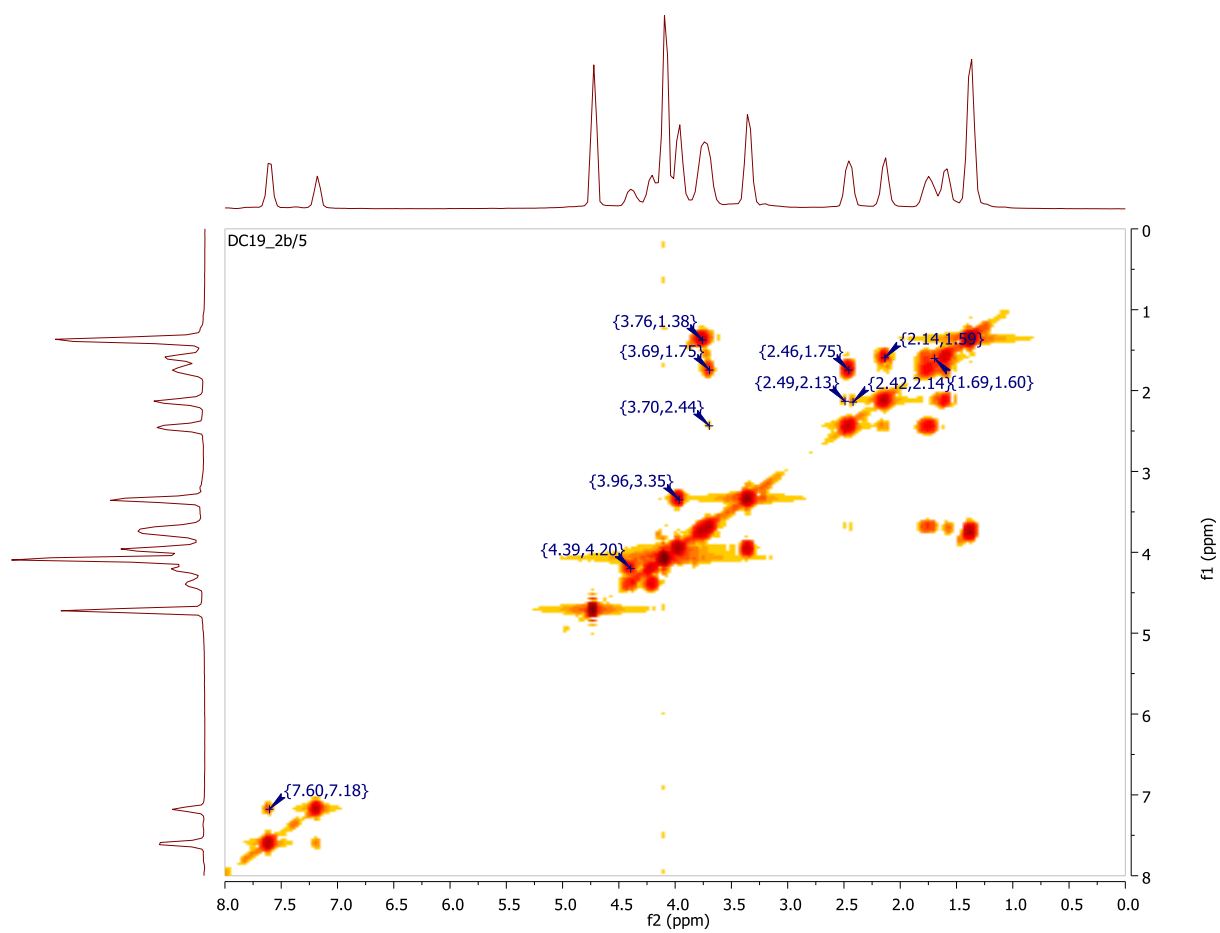

**Figure S24.**  $^1\text{H}$ - $^1\text{H}$  COSY NMR of  $\text{H}_2\text{CHXdedpa}_{\text{OMe}}\text{-}N,N'\text{-ee}$  (**3**) in  $\text{D}_2\text{O}$  (400 MHz, 55°C).

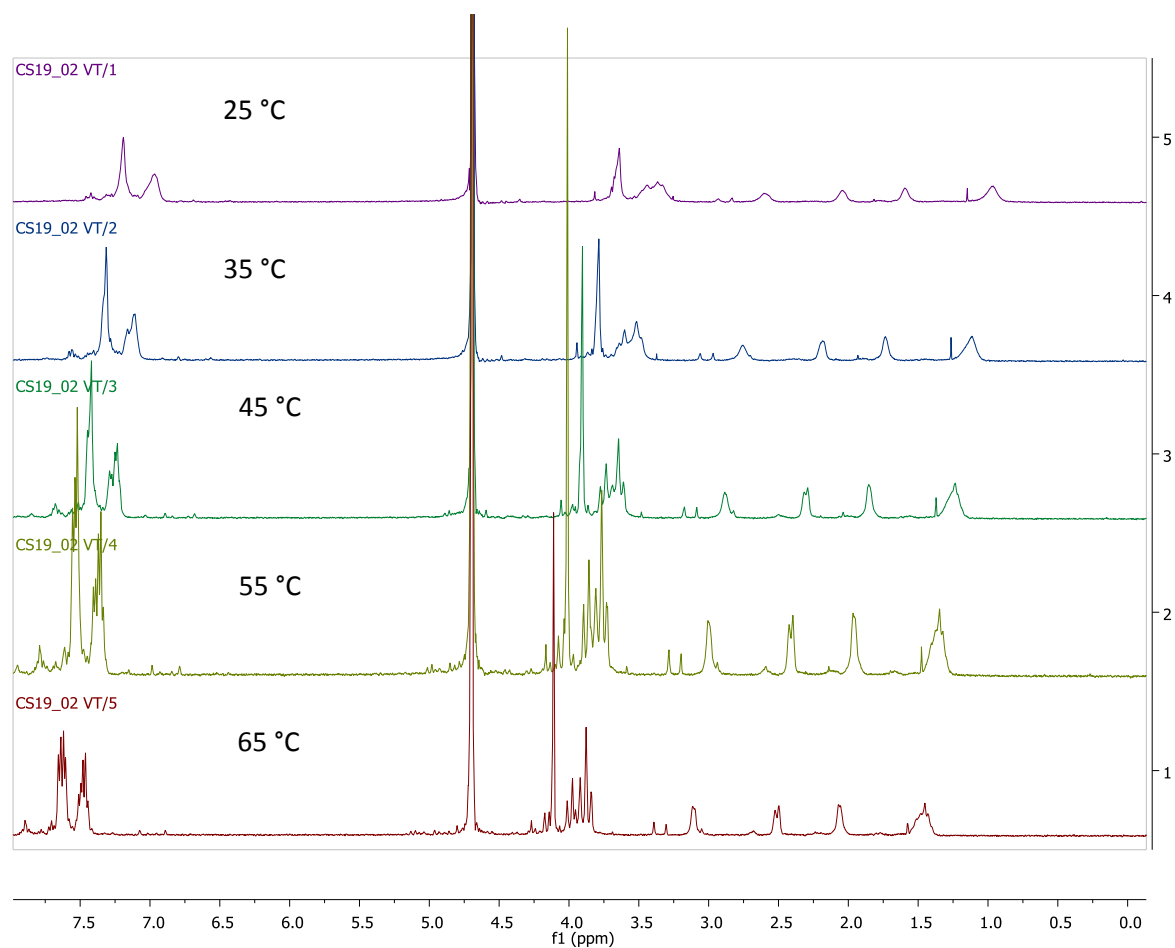

**Figure S25.**  $^1\text{H}$  VT NMR of  $\text{H}_2\text{CHXdedpa}_{\text{OMe}}\text{-N,N'-Bn}$  (**4**) in  $\text{D}_2\text{O}$  (400 MHz, 25-65°C).



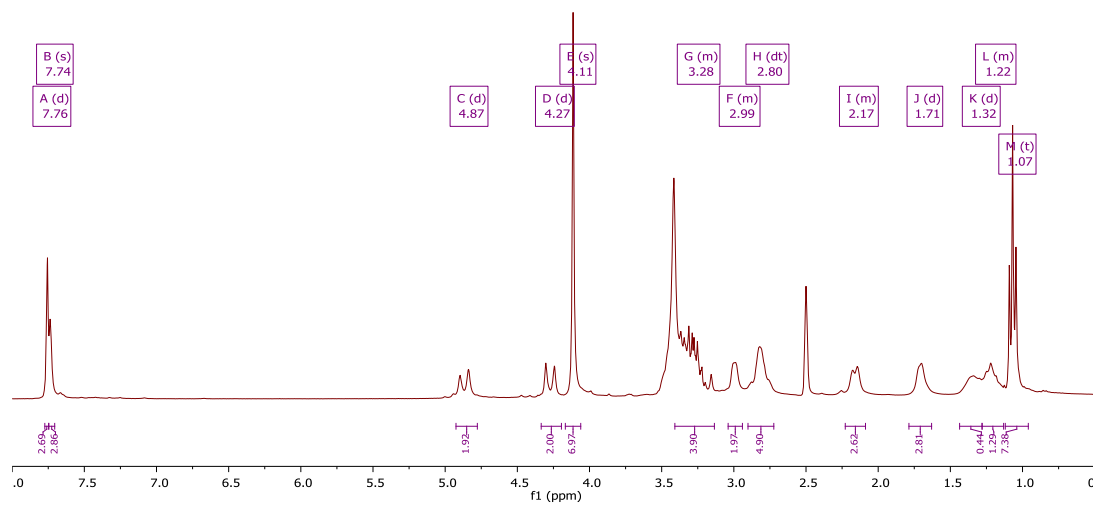

**Figure S26.**  $^1\text{H}$  NMR of  $[\text{Ga}(\mathbf{3})][\text{ClO}_4]$  in  $\text{DMSO-d}_6$  (300 MHz).

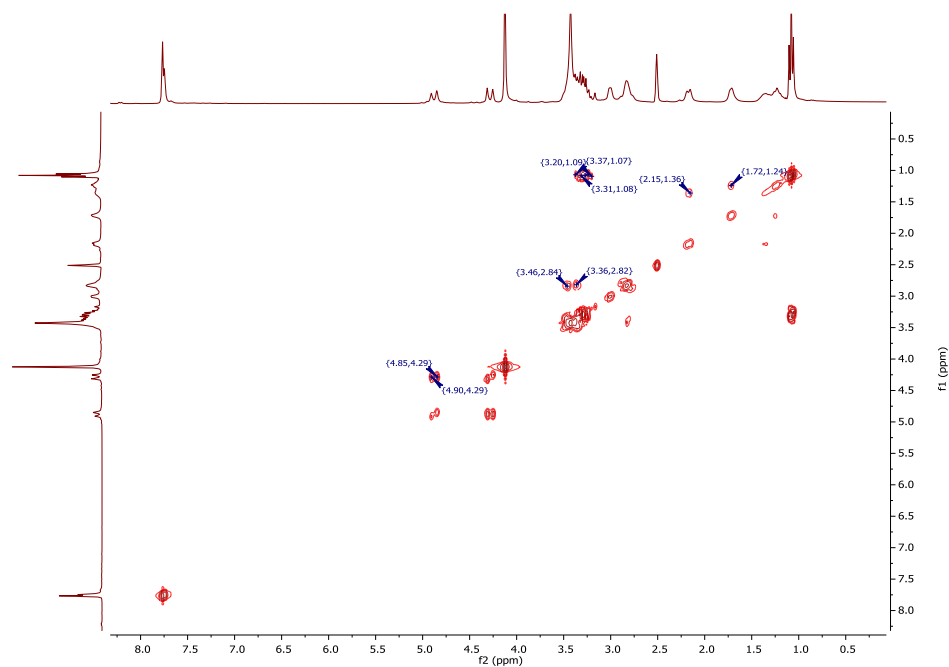

**Figure S27.**  $^1\text{H}$ - $^1\text{H}$  COSY NMR of  $[\text{Ga}(\mathbf{3})][\text{ClO}_4]$  in  $\text{DMSO-d}_6$  (300 MHz).

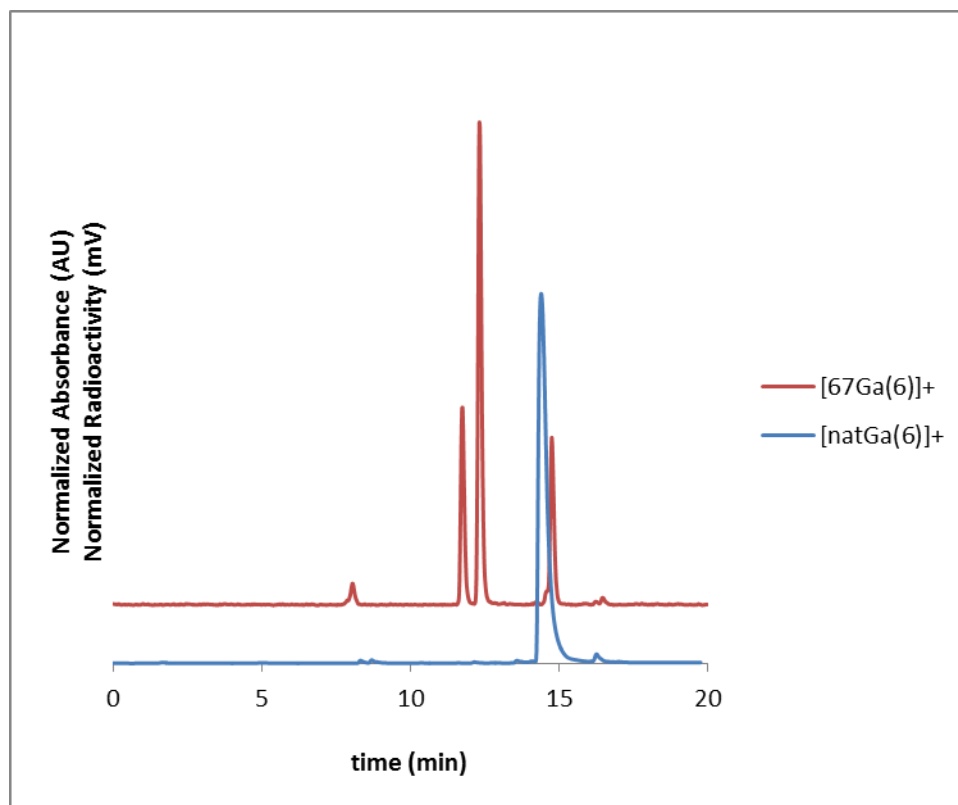

**Figure S28.** Stacked HPLC chromatograms of  $[^{67}\text{Ga}(\mathbf{6})]^+$  (red, radiotrace;  $t_R = 14.57$  min) and  $[\text{natGa}(\mathbf{6})]^+$  (blue, absorbance;  $t_R = 14.38$  min). Small shift in retention times are due to UV-Vis and radiation detector being placed in sequence in the HPLC set-up.

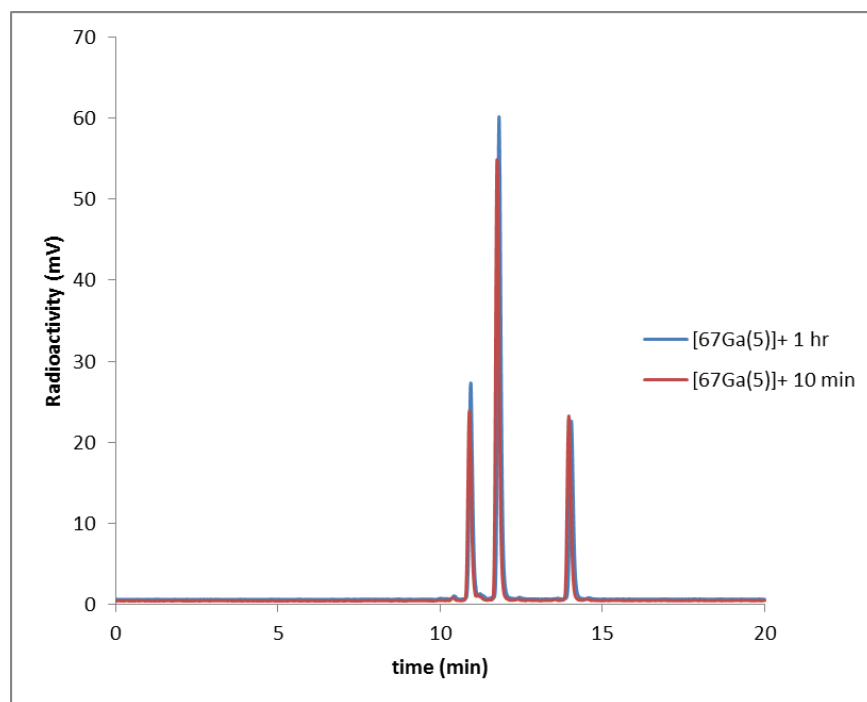

**Figure S29.** Overlaid HPLC radio-chromatograms of  $[^{67}\text{Ga}(\mathbf{5})]^+$ , injected at 10min and 1 hour showing no significant change in peak areas.

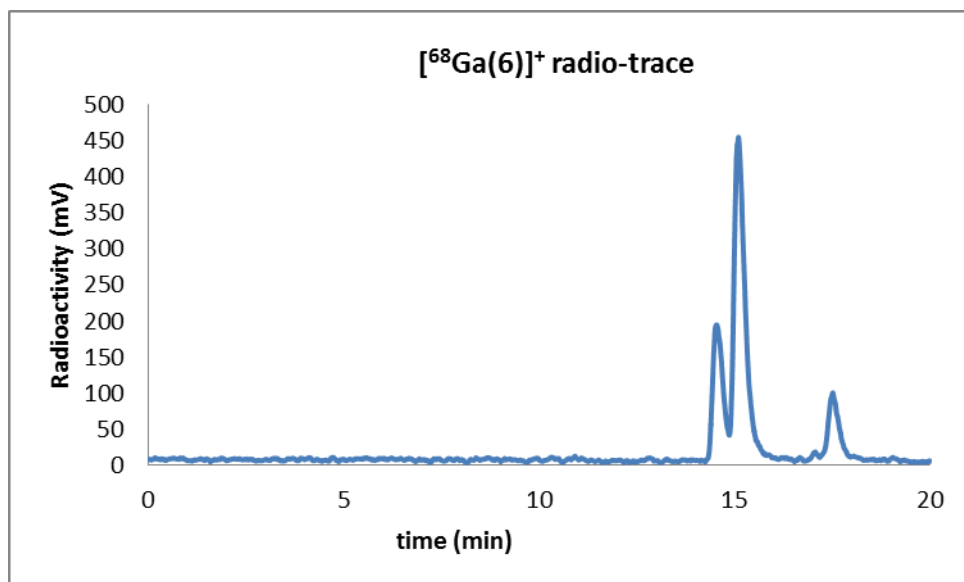

**Figure S30.** HPLC radio-chromatogram of [<sup>68</sup>Ga(6)]<sup>+</sup>, labelled at 10<sup>-4</sup> M, 10 minutes at room temperature.

Note: The <sup>68</sup>Ga radiolabeling experiments were analysed on a different HPLC system than the <sup>67</sup>Ga experiments, which explains the slight shift in retention times of the three product peaks compared to the [<sup>67</sup>Ga(6)]<sup>+</sup> radio-trace.
